# Supplementary material for: 22q11.2 Deletion Syndrome: Influence of Parental Origin on Clinical Heterogeneity
Source: MDPI journal article supplement (doi:10.3390/genes15040518), 2024-04-21
Supplement: s1 [file s1]

## Supplemental material

### 22q11.2 deletion syndrome: evidence of no influence of parental origin on clinical heterogeneity

Graphic result examples for microsatellite DNA markers and SNPs of one of the families (patient, mother, and father) is showed below.

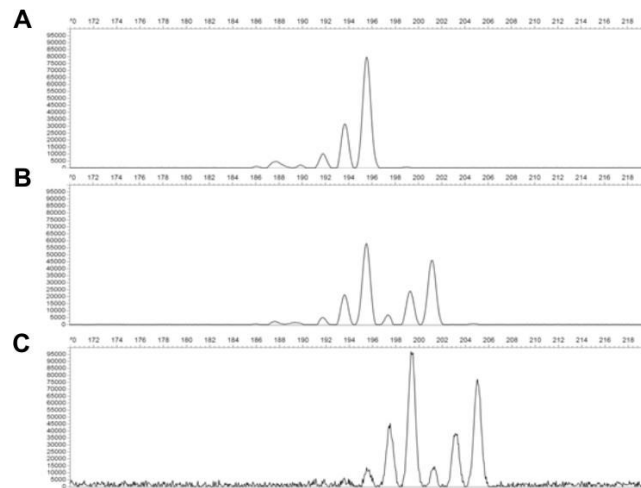

Supplemental Figure S1. **(A)** Graphic visualization of the DNA microsatellite genotyping of a proband, which due to the deletion presents only one allele, 196bp in size. **(B and C)** Alleles of the mother and father respectively, both heterozygous, one of the mother's alleles (196bp) has the same fragment size as the allele present in the proband (196bp), indicating that the transmitted allele to the proband comes from the mother, revealing a paternal origin of the deletion.

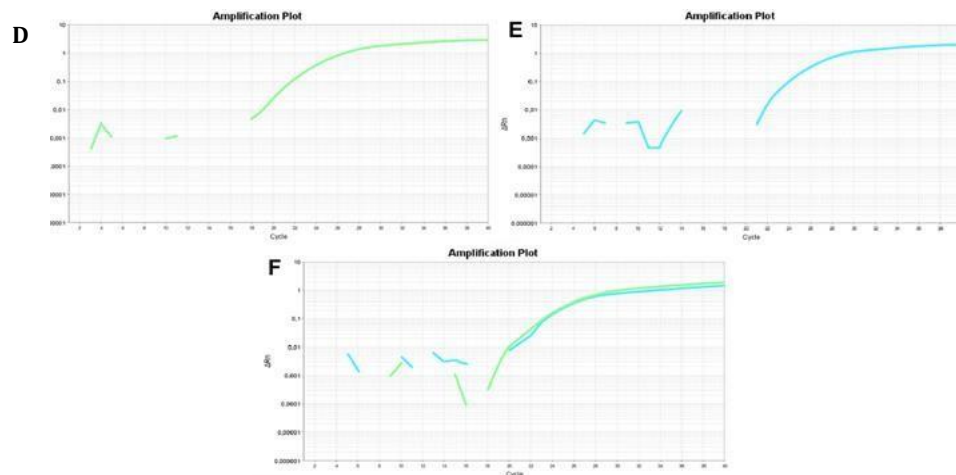

Supplemental Figure S2: (D) Proband's graph of allele curves obtained with qPCR, showing only one green curve, due to the deletion, determining that the proband has a C allele. (E) Father's graph that displays only one blue curve, indicating T/T homozygosity. (F) Mother's graph shows both blue and green curves, indicating C/T heterozygosity. Since only the proband and the mother exhibit the green curve, it can be inferred that the allele transmitted to the proband is of maternal origin, revealing a paternal origin of the deletion.

Supplemental Table S1: Parental origin definition by genotyping of DNA microsatellite markers and SNPs.

| Family    | D22S1638 | D22S941 | D22S944 | D22S1623 | D22S264 | rs4819519 | rs5993650 | Origin |
|-----------|----------|---------|---------|----------|---------|-----------|-----------|--------|
| <b>P1</b> | 2        | 8       | 4       | 6        | 3       | C         | C         | MAT    |
| <b>M1</b> | 7/7      | 13/13   | 5/5     | 6/6      | 2/9     | C/T       | C/T       |        |
| <b>F1</b> | -        | 8/16    | 4/7     | 6/6      | 3/9     | C/T       | C/T       |        |
| <b>P2</b> | 4        | 13      | 5       | 6        | 3       | -         | -         | MAT    |
| <b>M2</b> | 5/9      | 8/8     | 5/9     | 6/6      | 7/9     | -         | -         |        |
| <b>F2</b> | 4/9      | 8/13    | 5/5     | 6/6      | 3/3     | -         | -         |        |
| <b>P3</b> | 8        | 8       | 6       | 5        | 7       | C         | C         | MAT    |
| <b>M3</b> | 5/7      | 8/8     | 4/5     | 5/6      | 8/9     | T/T       | C/C       |        |
| <b>F3</b> | 7/8      | 8/13    | 5/6     | 5/5      | 7/10    | C/T       | C/T       |        |
| <b>P4</b> | 5        | 13      | 4       | 6        | 7       | C         | T         | MAT    |
| <b>M4</b> | -        | 4/8     | 6/7     | 2/5      | 6/9     | C/T       | C/T       |        |
| <b>F4</b> | -        | 13/13   | 4/5     | 5/6      | 7/10    | C/T       | T/T       |        |
| <b>P5</b> | 7        | 3       | 6       | -        | 7       | C         | T         | MAT    |
| <b>M5</b> | 6/7      | 8/16    | 5/7     | 5/6      | 6/7     | C/T       | C/C       |        |
| <b>F5</b> | 4/7      | 3/8     | 5/6     | 5/6      | 6/7     | C/T       | C/T       |        |
| <b>P6</b> | 8        | 3       | 4       | 5        | 10      | C         | T         | PAT    |
| <b>M6</b> | 5/8      | 3/13    | 4/5     | 5/6      | 7/10    | C/T       | T/T       |        |
| <b>F6</b> | 2/5      | 8/14    | 5/6     | 1/5      | 3/6     | C/T       | C         |        |
| <b>P7</b> | 5        | 13      | 5       | 5        | 7       | C         | T         | PAT    |
| <b>M7</b> | 2/5      | 13/15   | 4/5     | 5/6      | 7/8     | C/C       | C/T       |        |

|            |             |              |             |            |             |            |            |     |
|------------|-------------|--------------|-------------|------------|-------------|------------|------------|-----|
| <b>P8</b>  | <b>6</b>    | <b>4</b>     | <b>3</b>    | <b>6</b>   | <b>8</b>    | -          | -          | MAT |
| <b>M8</b>  | 7           | 4/14         | 4/5         | 1/6        | 6/7         | -          | -          |     |
| <b>F8</b>  | <b>4/6</b>  | 8/12         | <b>3/5</b>  | 5/6        | <b>7/8</b>  | -          | -          |     |
| <b>P9</b>  | 7           | 8            | <b>8</b>    | <b>7</b>   | 8           | C          | C          | MAT |
| <b>M9</b>  | 7/9         | 8/8          | 4/7         | 5/5        | 8/9         | C/T        | C/T        |     |
| <b>F9</b>  | 5/7         | 8/14         | <b>4/8</b>  | <b>5/7</b> | 6/8         | C/C        | C/C        |     |
| <b>P10</b> | <b>7</b>    | 8            | <b>2</b>    | 6          | 9           | C          | C          | MAT |
| <b>M10</b> | 5/8         | 8/12         | 5/7         | 6/8        | 9/9         | C/C        | C/C        |     |
| <b>F10</b> | <b>5/7</b>  | 8/9          | <b>2/7</b>  | 5/6        | 2/9         | C/T        | C/C        |     |
| <b>P11</b> | <b>4</b>    | 12           | <b>6</b>    | 5          | <b>7</b>    | -          | T          | MAT |
| <b>M11</b> | 3/7         | 12/16        | 4/4         | 5/5        | 2/9         | C/C        | C/T        |     |
| <b>F11</b> | <b>3/4</b>  | 8/12         | <b>4/6</b>  | 5/5        | <b>7/7</b>  | T/T        | C/T        |     |
| <b>P12</b> | 3           | <b>3</b>     | 5           | 5/5        | 9           | T          | <b>T</b>   | MAT |
| <b>M12</b> | 3/2         | 8/14         | 5/6         | 5/5        | 7/9         | T/T        | C/C        |     |
| <b>F12</b> | 3/2         | <b>3/8</b>   | 4/5         | 5/6        | 9/11        | C/T        | <b>C/T</b> |     |
| <b>P13</b> | <b>2</b>    | <b>7</b>     | 5           | <b>6</b>   | <b>8</b>    | T          | C          | PAT |
| <b>M13</b> | <b>2/13</b> | <b>7/12</b>  | 5/5         | <b>6/6</b> | <b>7/8</b>  | C/T        | C/T        |     |
| <b>F13</b> | 3/5         | 4/13         | 5/6         | 3/4        | 6/9         | C/T        | C/C        |     |
| <b>P14</b> | 7           | <b>11</b>    | 4           | <b>6</b>   | <b>8</b>    | C          | T          | MAT |
| <b>M14</b> | 7/7         | 12/15        | 4/5         | 4/4        | 2/7         | C/C        | C/C        |     |
| <b>F14</b> | 6/7         | <b>7/11</b>  | 4/5         | <b>6/6</b> | <b>8/10</b> | C/C        | -          |     |
| <b>P15</b> | <b>6</b>    | <b>7</b>     | <b>4</b>    | <b>4</b>   | <b>8</b>    | C          | <b>C</b>   | MAT |
| <b>M15</b> | 2/7         | 4/12         | 5/5         | 6/6        | 6/10        | C/C        | T/T        |     |
| <b>F15</b> | <b>5/6</b>  | <b>7/7</b>   | <b>4/4</b>  | <b>4/6</b> | <b>7/8</b>  | C/C        | <b>C/C</b> |     |
| <b>P16</b> | <b>6</b>    | 12           | 5           | 6          | <b>2</b>    | C          | <b>C</b>   | PAT |
| <b>M16</b> | <b>6/6</b>  | 7/7          | 5/5         | 6/9        | <b>2/8</b>  | C/T        | <b>C/C</b> |     |
| <b>F16</b> | 5/7         | 2/12         | 5/10        | 3/6        | 8/8         | C/C        | T/T        |     |
| <b>P17</b> | 4           | 7            | <b>5</b>    | 6          | <b>2</b>    | <b>C</b>   | <b>T</b>   | PAT |
| <b>M17</b> | 2/4         | 7/12         | <b>5/11</b> | 4/6        | <b>2/11</b> | <b>C/C</b> | <b>C/T</b> |     |
| <b>F17</b> | 4/6         | 7/11         | 6/7         | 5/6        | 8/9         | T/T        | C/C        |     |
| <b>P18</b> | <b>2</b>    | 12           | <b>4</b>    | <b>1</b>   | <b>10</b>   | T          | <b>T</b>   | PAT |
| <b>M18</b> | <b>2/7</b>  | 12/13        | <b>4/5</b>  | <b>1/6</b> | <b>2/10</b> | T/T        | <b>T/T</b> |     |
| <b>F18</b> | 5/7         | 5/12         | 5/5         | 4/6        | 7/7         | T/T        | C/C        |     |
| <b>P19</b> | 7           | <b>12</b>    | <b>5</b>    | <b>4</b>   | <b>7</b>    | -          | -          | PAT |
| <b>M19</b> | 7/7         | <b>12/13</b> | <b>5/5</b>  | <b>4/4</b> | <b>7/10</b> | -          | -          |     |
| <b>F19</b> | 7/8         | 8/15         | 3/6         | 6/8        | 9/12        | -          | -          |     |
| <b>P20</b> | <b>2</b>    | 7            | <b>6</b>    | <b>4</b>   | 7           | C          | C          | PAT |
| <b>M20</b> | <b>2/2</b>  | 7/12         | <b>6/10</b> | <b>4/6</b> | 2/7         | C/T        | C/T        |     |
| <b>F20</b> | 6/6         | 7/12         | 5/5         | 6/6        | 7/9         | C/C        | C/T        |     |
| <b>P21</b> | 9           | <b>13</b>    | <b>5</b>    | 5          | <b>1</b>    | <b>T</b>   | T          | PAT |
| <b>M21</b> | 9/9         | <b>7/13</b>  | <b>5/5</b>  | 5/5        | <b>1/1</b>  | <b>C/T</b> | C/C        |     |
| <b>F21</b> | 3/9         | 7/12         | 4/4         | 5/5        | 8/8         | -          | -          |     |
| <b>P22</b> | 9           | 12           | <b>5</b>    | <b>4</b>   | <b>1</b>    | -          | -          | PAT |

|            |             |              |             |            |              |            |            |     |
|------------|-------------|--------------|-------------|------------|--------------|------------|------------|-----|
| <b>M22</b> | 9/9         | 12/12        | <b>3/5</b>  | <b>4/4</b> | <b>1/7</b>   | -          | -          |     |
| <b>F22</b> | 9/9         | 12/15        | 3/9         | 5/5        | 8/8          | C/T        | C/T        |     |
| <b>P23</b> | 9           | <b>14</b>    | <b>8</b>    | <b>5</b>   | <b>9</b>     | <b>T</b>   | <b>C</b>   | PAT |
| <b>M23</b> | 9/9         | <b>2/14</b>  | <b>3/8</b>  | <b>4/5</b> | <b>5/9</b>   | <b>C/T</b> | <b>C/T</b> |     |
| <b>F23</b> | 6/9         | 7/12         | 6/10        | 4/4        | 1/10         | C/C        | C/T        |     |
| <b>P24</b> | <b>5</b>    | <b>13</b>    | <b>5</b>    | 5          | <b>11</b>    | <b>C</b>   | <b>T</b>   | MAT |
| <b>M24</b> | 3/9         | 7/9          | 3/6         | 4/5        | 1/6          | C/T        | C/C        |     |
| <b>F24</b> | <b>5/5</b>  | <b>13/13</b> | <b>4/5</b>  | 5/5        | <b>9/11</b>  | C/T        | <b>T/T</b> |     |
| <b>P25</b> | <b>5</b>    | <b>6</b>     | <b>5</b>    | 3          | 11           | -          | <b>C</b>   | MAT |
| <b>M25</b> | <b>9</b>    | <b>5/8</b>   | <b>3/3</b>  | 2/4        | 5/10         | C/T        | C/C        |     |
| <b>P26</b> | <b>3</b>    | <b>15</b>    | <b>3</b>    | <b>5</b>   | <b>9</b>     | <b>C</b>   | <b>C</b>   | MAT |
| <b>M26</b> | 9/9         | 2/4          | 4/4         | 4/4        | 4/6          | C/C        | C/T        |     |
| <b>F26</b> | <b>1/3</b>  | <b>15/15</b> | <b>3/4</b>  | <b>5/5</b> | <b>8/9</b>   | -          | -          |     |
| <b>P27</b> | 9           | <b>12</b>    | <b>4</b>    | 4          | <b>8</b>     | -          | -          | PAT |
| <b>M27</b> | 7/9         | <b>8/12</b>  | <b>4/4</b>  | 4/4        | <b>1/8</b>   | C/T        | C/T        |     |
| <b>F27</b> | 6/9         | 2/8          | 5/5         | 4/4        | 1/5          | C/T        | C/T        |     |
| <b>P28</b> | <b>5</b>    | <b>13</b>    | <b>5</b>    | <b>5</b>   | <b>10</b>    | <b>C</b>   | <b>T</b>   | PAT |
| <b>M28</b> | <b>4/5</b>  | <b>13/13</b> | <b>5/5</b>  | <b>5/6</b> | <b>9/10</b>  | C/T        | <b>T/T</b> |     |
| <b>F28</b> | 1/1         | 7/7          | 4/4         | 4          | 7/8          | C/C        | C/C        |     |
| <b>P29</b> | 4           | <b>4</b>     | 5           | <b>5</b>   | <b>6</b>     | <b>C</b>   | <b>T</b>   | MAT |
| <b>M29</b> | 4/4         | 13/13        | 5/5         | 4/6        | 2/7          | C/T        | T/T        |     |
| <b>F29</b> | 4/9         | <b>4/13</b>  | 5/5         | <b>5/5</b> | <b>6/9</b>   | C/T        | C/T        |     |
| <b>P30</b> | <b>7</b>    | <b>8</b>     | 4           | <b>6</b>   | <b>10</b>    | <b>C</b>   | <b>C</b>   | PAT |
| <b>M30</b> | <b>7/7</b>  | <b>8/8</b>   | 4/6         | <b>5/6</b> | <b>9/10</b>  | C/C        | C/C        |     |
| <b>F30</b> | 9/9         | 9/9          | 4/4         | 5/5        | 7            | C/C        | C/C        |     |
| <b>P31</b> | 7           | <b>8</b>     | 4           | 6          | <b>10</b>    | <b>C</b>   | <b>C</b>   | PAT |
| <b>M31</b> | 7/7         | <b>8/13</b>  | 4/5         | 6/6        | <b>10/10</b> | C/C        | <b>C/T</b> |     |
| <b>F31</b> | 2/7         | 13/13        | 4/5         | 5/6        | 2/7          | C/T        | T/T        |     |
| <b>P32</b> | <b>4</b>    | 13           | <b>11</b>   | 4          | <b>6</b>     | -          | -          | MAT |
| <b>M32</b> | 5/8         | 13/13        | 2/5         | 3/4        | 7/7          | C/C        | C/T        |     |
| <b>F32</b> | <b>4/9</b>  | 9/13         | <b>4/11</b> | 4/4        | <b>6/9</b>   | -          | C/T        |     |
| <b>P33</b> | <b>8</b>    | <b>14</b>    | <b>4</b>    | <b>6</b>   | <b>12</b>    | <b>C</b>   | <b>T</b>   | PAT |
| <b>M33</b> | <b>8/11</b> | <b>5/14</b>  | <b>4/4</b>  | <b>1/6</b> | <b>2/12</b>  | C/C        | C/T        |     |
| <b>F33</b> | 2/2         | 13/13        | 5/11        | 5/8        | 7/7          | C/T        | T/T        |     |
| <b>P34</b> | <b>3</b>    | <b>14</b>    | <b>4</b>    | <b>4</b>   | <b>7</b>     | <b>T</b>   | <b>C</b>   | PAT |
| <b>M34</b> | <b>3/3</b>  | <b>13/14</b> | <b>4/5</b>  | <b>4/4</b> | <b>7/7</b>   | C/T        | C/T        |     |
| <b>F34</b> | 2/7         | 8/13         | 5/5         | 5/5        | 2/2          | C/T        | C/T        |     |
| <b>P35</b> | <b>5</b>    | <b>14</b>    | 5           | 6          | <b>7</b>     | <b>C</b>   | <b>T</b>   | MAT |
| <b>M35</b> | 3/6         | 10/13        | 2/5         | 5/6        | 6/9          | C/T        | T/T        |     |
| <b>F35</b> | <b>2/5</b>  | <b>14/14</b> | 5/10        | 6/6        | <b>7/7</b>   | C/T        | T/T        |     |
| <b>P36</b> | <b>7</b>    | 13           | <b>5</b>    | 5          | <b>7</b>     | -          | -          | PAT |
| <b>M36</b> | <b>7/7</b>  | 9/13         | <b>5/5</b>  | 5/5        | <b>7/7</b>   | -          | -          |     |
| <b>F36</b> | 5/5         | 13/13        | 7/7         | 5/6        | 6/6          | -          | -          |     |

|            |      |       |      |     |       |     |     |     |
|------------|------|-------|------|-----|-------|-----|-----|-----|
| <b>P37</b> | 8    | 7     | 5    | 5   | 5     | T   | C   | PAT |
| <b>M37</b> | 8/8  | 7/16  | 5/5  | 5/6 | 5/10  | C/T | U   |     |
| <b>F37</b> | 8/8  | 8/13  | 6/8  | 5/5 | 5/7   | C/C | C/T |     |
| <b>P38</b> | 4    | 13    | -    | 6   | 7     | T   | T   | MAT |
| <b>M38</b> | 2/7  | 12/14 | 6/11 | 5/6 | 10/10 | C/T | T/T |     |
| <b>F38</b> | 4/4  | 13/13 | 4/4  | 5/6 | 2/7   | T/T | T/T |     |
| <b>P39</b> | 4    | 14    | 3    | 6   | 7     | C   | T   | PAT |
| <b>M39</b> | 4/7  | 14/14 | 3/4  | 6/6 | 5/7   | C/C | T/T |     |
| <b>F39</b> | 6/6  | 6/12  | 6/11 | 5/5 | 7/10  | C/T | C/T |     |
| <b>P40</b> | 2    | 13    | 4    | 5   | 6     | -   | -   | PAT |
| <b>M40</b> | 2/2  | 13/13 | 4/5  | 5/5 | 6/9   | -   | -   |     |
| <b>F40</b> | -    | -     | 4/4  | -   | 10/11 | -   | -   |     |
| <b>P41</b> | 7    | 4     | 1    | 6   | 8     | T   | T   | PAT |
| <b>M41</b> | 4/7  | 4/4   | 1/5  | 6/6 | 8/11  | C/T | T/T |     |
| <b>F41</b> | 7/10 | 14/18 | 6/6  | 4/4 | -     | C/T | C/C |     |
| <b>P42</b> | 5    | 14    | 5    | 3   | 6     | T   | T   | MAT |
| <b>M42</b> | 5/7  | 9/13  | 5/11 | 5/5 | 3/7   | T/T | C/T |     |
| <b>F42</b> | 2/5  | 9/14  | 5/5  | 3/5 | 6/6   | T/T | C/T |     |
| <b>P43</b> | 7    | 12    | 7    | 6   | 10    | T   | T   | MAT |
| <b>M43</b> | 4/7  | 12/12 | 6/9  | 1/5 | 7/10  | T/T | T/T |     |
| <b>F43</b> | 5/7  | 11/12 | 5/7  | 5/6 | 2/10  | C/T | T/T |     |
| <b>P44</b> | 7    | 14    | 6    | 5   | -     | C   | T   | MAT |
| <b>M44</b> | 4/7  | 9/17  | 6/8  | 5/5 | 7/10  | C/T | C/C |     |
| <b>F44</b> | 4/7  | 9/14  | 6/6  | 5/6 | 7/9   | C/C | C/T |     |
| <b>P45</b> | 2    | 14    | 5    | 5   | 7     | C   | T   | PAT |
| <b>M45</b> | 2/6  | 12/14 | 5/5  | 1/5 | 7/7   | C/T | -   |     |
| <b>F45</b> | 4/7  | 17/17 | 5/5  | 6/6 | 2/10  | C/C | C/T |     |
| <b>P46</b> | 7    | 10    | 5    | 5   | 9     | C   | C   | PAT |
| <b>M46</b> | 7/7  | 10/13 | 4/5  | 5/8 | 2/9   | C/T | C/T |     |
| <b>F46</b> | 4/5  | 14/14 | 4/5  | 6/8 | 2/10  | C/T | T/T |     |
| <b>P47</b> | 2    | 14    | 1    | 6   | 2     | T   | T   | PAT |
| <b>M47</b> | 2/7  | 9/14  | 1/5  | 6/6 | 2/9   | C/T | C/T |     |
| <b>F47</b> | 2/4  | 14/14 | 6/6  | 4/4 | 2/2   | -   | C/T |     |
| <b>P48</b> | 8    | 9     | 4    | 6   | 11    | T   | C   | PAT |
| <b>M48</b> | 5/8  | 6/9   | 4/6  | 3/6 | 6/11  | T/T | C/C |     |
| <b>F48</b> | 7    | 14/14 | 2/7  | 5/6 | 2/9   | C/T | C/T |     |
| <b>P49</b> | 6    | 9     | 6    | 5   | -     | C   | C   | MAT |
| <b>M49</b> | 7/7  | 4/4   | 5/5  | 4/4 | 8/10  | T/T | -   |     |
| <b>F49</b> | 6/7  | 9/15  | 5/6  | 5/5 | 6/7   | C/T | C/C |     |
| <b>P50</b> | 9    | 6     | 7    | 6   | 6     | C   | C   | MAT |
| <b>M50</b> | 7/7  | 15/17 | 4/5  | 6/6 | 9/10  | C/T | C/T |     |
| <b>P51</b> | 6    | 14    | 9    | 6   | -     | T   | T   | MAT |
| <b>M51</b> | 4/5  | 14/17 | 5/5  | 5/5 | 6/6   | T/T | C/T |     |

|            |      |       |     |     |      |     |     |     |
|------------|------|-------|-----|-----|------|-----|-----|-----|
| <b>P52</b> | 7    | 15    | 4   | 6   | 7    | T   | T   | MAT |
| <b>M52</b> | 7/9  | 1/1   | 4/5 | 5/6 | 2/9  | C/C | C/T |     |
| <b>P53</b> | 7    | 14    | 5   | 5   | 6    | C   | T   | PAT |
| <b>M53</b> | 2/7  | 4/14  | 5/5 | 5/5 | 6/10 | C/T | T/T |     |
| <b>P54</b> | 7    | 10    | 7   | 6   | 9    | C   | C   | PAT |
| <b>M54</b> | 7/8  | 10/15 | 6/7 | 6/8 | 8    | C/C | C/T |     |
| <b>P55</b> | 7    | 15    | 5   | 4   | 9    | C   | C   | PAT |
| <b>M55</b> | 7/7  | 14/16 | 5/5 | 4/4 | 2/9  | C/T | C/T |     |
| <b>P56</b> | 7    | 9     | 6   | 5   | 8    | -   | T   | PAT |
| <b>M56</b> | 2/7  | 9/14  | 4/6 | 5/5 | 6/8  | C/T | T/T |     |
| <b>P57</b> | 4    | 9     | 5   | 5   | 6    | C   | C   | MAT |
| <b>M57</b> | 5/7  | 12/14 | 4/5 | 4/6 | 8/10 | C/T | C/C |     |
| <b>P58</b> | 6    | 16    | 6   | 4   | 10   | T   | C   | PAT |
| <b>M58</b> | 6/8  | 15/16 | 2/6 | 4/5 | 9/10 | T/T | -   |     |
| <b>P59</b> | 7    | 9     | 11  | 9   | 10   | C   | C   | MAT |
| <b>M59</b> | 5/7  | 9/14  | 6/7 | 6/6 | 6/10 | C/T | C/T |     |
| <b>P60</b> | 5    | 14    | 4   | 6   | 8    | -   | -   | MAT |
| <b>M60</b> | 7/12 | 9/9   | 5/6 | 3/6 | 7/10 | T/T | C/C |     |
| <b>P61</b> | 2    | 4     | 5   | 5   | 7    | C   | -   | PAT |
| <b>M61</b> | 2/6  | 4/9   | 5/5 | 5/6 | 2/7  | C/C | -   |     |

(P) proband, (M) mother, and (F) father; (MAT) Maternal, (PAT) paternal. D22S1638, D22S941, D22S944, D22S1623, D22S264 are microsatellite DNA markers and rs4819519 and rs5993650 are SNP assays. Each allele of the microsatellite markers was numbered according to the fragment size.
